# Supplementary material
Source: Springer Nature journal article supplement (https://www.springermedizin.de/resource/supplementary/12887_2014_1193_MOESM5_ESM.pdf/9476770)
Supplement: MOESM5 [file 9476770]

### At the time of death

- Offer all parents the chance to see and hold their child's body even following a traumatic death.
- Allow families time and space to say goodbye to their child.

### Days after the death

- Parents need to know how and why their child died; this information is often not available immediately.
- Doctors should ensure that this information is shared with parents at a later date.

### Weeks after the death

- Parents should be offered follow-up appointments with paediatricians, bereavement teams or family doctors.
- These appointments allow parents further opportunities to discuss their child's death as well as providing emotional support.
